# Supplementary material
Source: PubMed Central journal article supplement (PMC4634098)
Supplement: supp_pp.15.01236_01236revSupplemental_Information_Revised.pdf [file supp_pp.15.01236_01236revSupplemental_Information_Revised.pdf]

## **SUPPLEMENTAL MATERIAL**

### **Ectopic expression of *WRI1* affects fatty acid homeostasis in *Brachypodium distachyon* vegetative tissues<sup>‡</sup>**

Yang Yang<sup>1,2</sup>, Jacob Munz<sup>2,3,†</sup>, Cynthia Cass<sup>2,3</sup>, Agnieszka Zienkiewicz<sup>1,2</sup>, Que Kong<sup>1,2</sup>, Wei Ma<sup>2,4</sup>, Sanjaya<sup>2,§</sup>, John Sedbrook<sup>2,3</sup>, Christoph Benning<sup>1,2,5,\*</sup>

**Supplemental Figure S1.** Alignment of *WRI1* amino acid sequences from *Brachypodium* and *Arabidopsis*.

**Supplemental Figure S2.** Lipid droplets are abundant in embryo and endosperm of *UBI::BdWRI1* line 5A dry grains.

**Supplemental Figure S3.** Lipid droplets in the internodes of *UBI::BdWRI1* plants.

**Supplemental Figure S4.** Ectopic expression of *AtWRI1* also led to cell death in *Brachypodium*.

**Supplemental Figure S5.** Ectopic expression of *AtWRI1* in *Arabidopsis* did not lead to cell death.

**Supplemental Figure S6.** No induction of TAG turnover in *35S::AtWRI1* vegetative tissues of *Arabidopsis*.

**Supplemental Figure S7.** Palmitic acid (16:0) treatment of *Brachypodium* leaf blade results in cell death.

**Supplemental Table S1.** PCR primers used in real-time RT-PCR.

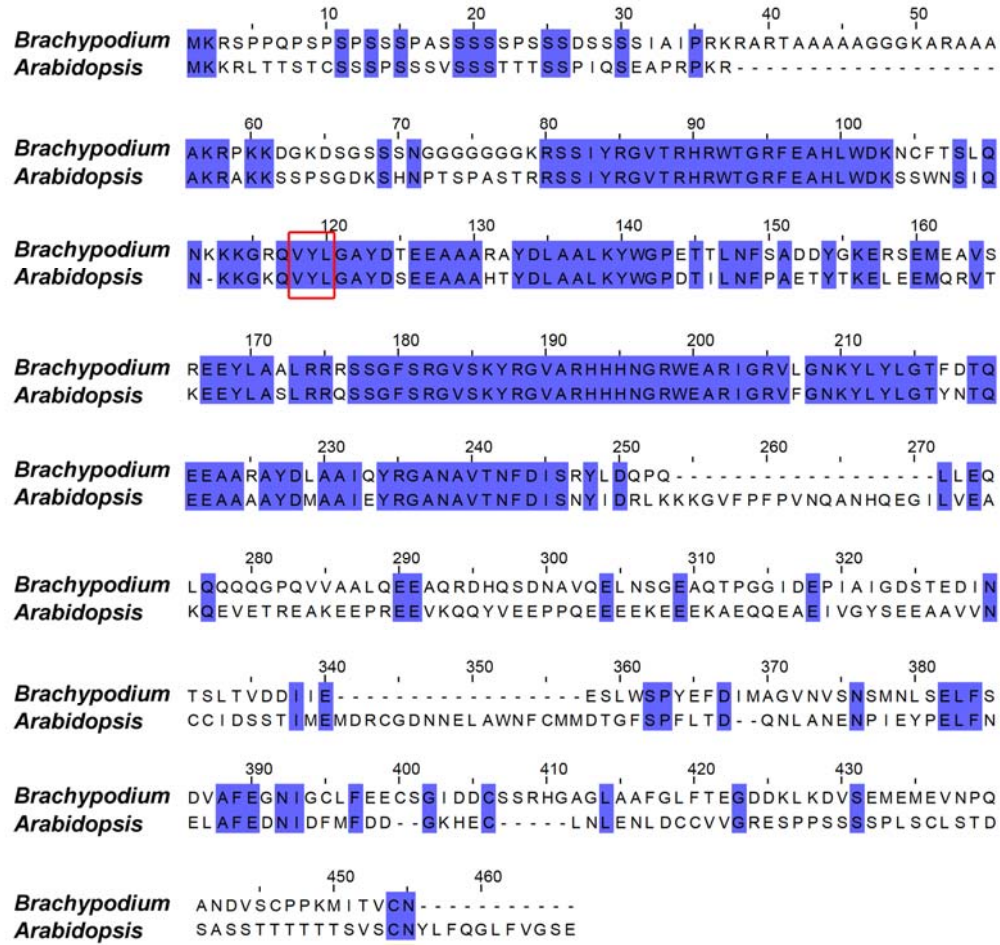

**Figure S1.** Alignment of WR11 amino acid sequences from *Brachypodium* and *Arabidopsis*. The alignment was analyzed by Jalview software. The blue boxes indicate highly conserved amino acids. The red box delineates the "VYL" motif, which is important for AtWR11 function.

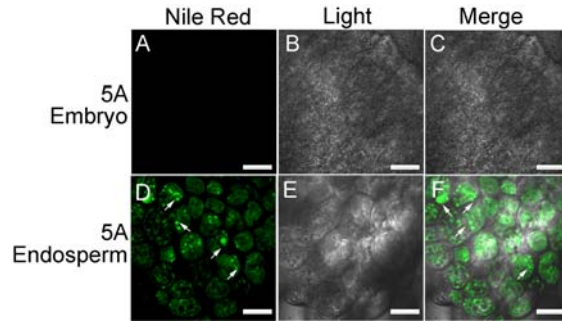

**Figure S2.** Lipid droplets are abundant in embryo and endosperm of *UBI::BdWR11* line 5A dry grains. A-C, confocal fluorescence micrographs of *UBI::BdWR11* line 5A embryo. D-F, confocal fluorescence micrographs of *UBI::BdWR11* line 5A endosperm.. Bars=20  $\mu$ m.

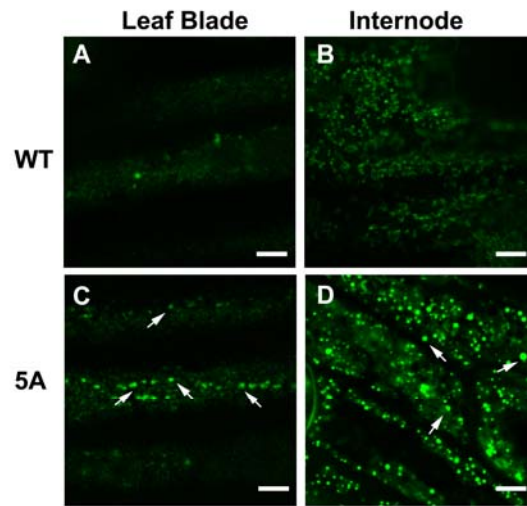

**Figure S3.** Lipid droplets in the internodes of *UBI::BdWR11* plants.

A and B, Nile Red staining of 8-week-old Bd21-3 leaf blade (A) and internode (B).

Bar=5  $\mu$ m. C and D, Nile Red staining of 8-week-old *Ub::BdWR11* leaf blade (C) and internode (D). Bar=5  $\mu$ m.

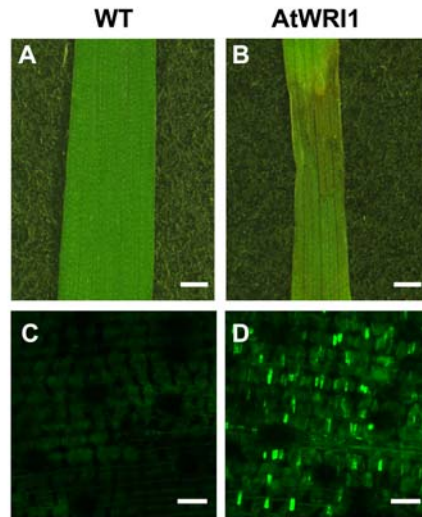

**Figure S4.** Ectopic expression of *AtWR11* also led to cell death in Brachypodium.

A and B, Phenotypes of 8-week-old leaf blades from Bd21-3 (A) and *UBI::AtWR11* plants (B). Bars=1 mm. C and D, H<sub>2</sub>DCF-DA staining of 8-week-old leaf blades from Bd21-3 (C) and *UBI::AtWR11* plants (D). Bars=20  $\mu$ m.

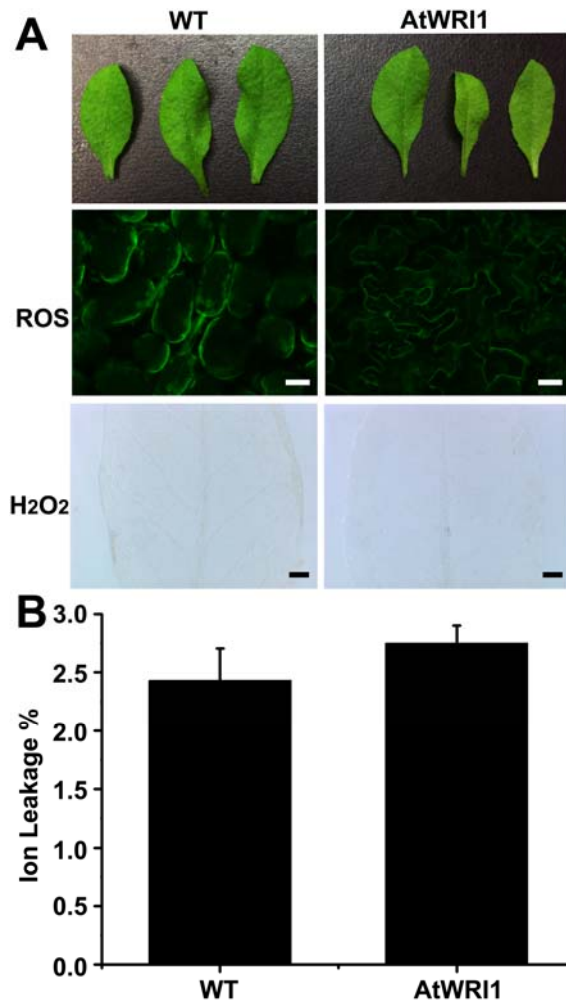

**Figure S5.** Ectopic expression of *AtWR11* in Arabidopsis did not lead to cell death.

A, phenotypes of 4-week-old *35S::AtWR11* leaves (top panels). General ROS accumulation was detected by H<sub>2</sub>DCF-DA staining (middle panels, Bars=20 μm). H<sub>2</sub>O<sub>2</sub> accumulation was detected by DAB staining (lower panels, Bars=0.5 mm). B, quantification of cell death by electrolyte leakage assay. 4-week-old detached leaves were inoculated with water for 3 hours and then excised to measure conductivity. Each value represents the mean and SD of three replicates.

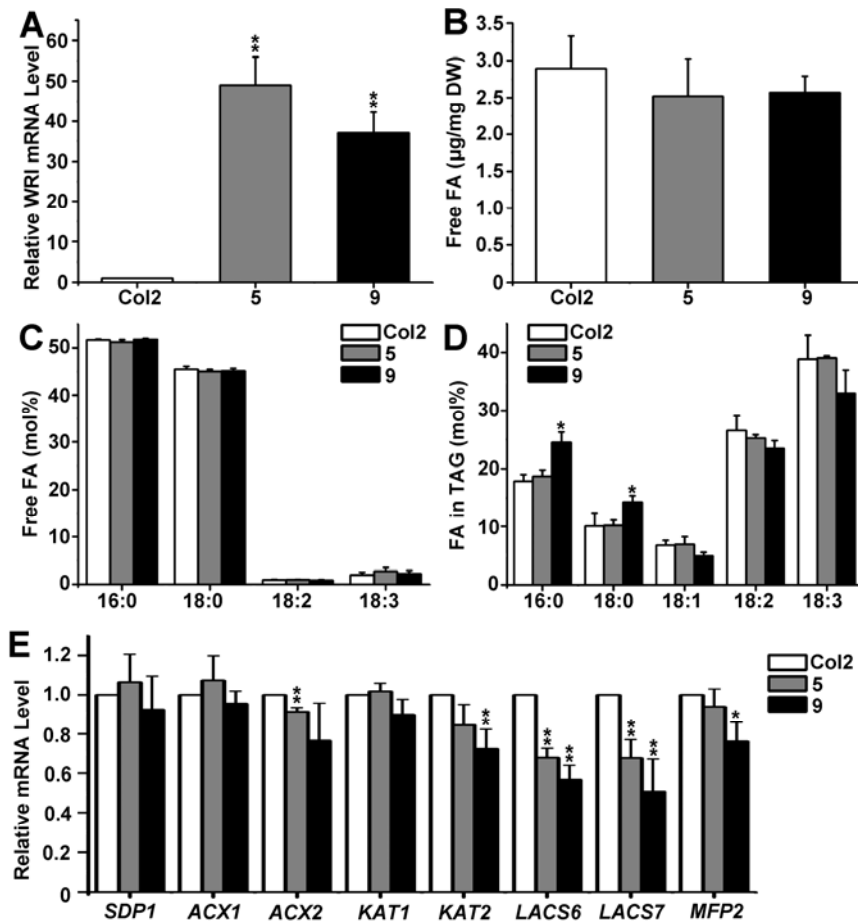

**Figure S6.** No induction of TAG turnover in *35S::AtWRII* vegetative tissues of Arabidopsis. A and E, expression levels of *AtWRII* (A) and key genes predicted to encode enzymes involved in TAG degradation (E) in 4-week-old leaf tissues from *35S::AtWRII* plants. Total RNA was isolated and relative mRNA levels were determined by quantitative real-time RT-PCR using *AtACTIN1* as an internal control. Data represent three independent experiments, and the error bars represent SD. \* indicates significant difference ( $p < 0.05$ , student's t-test), and \*\* at  $p \leq 0.01$ . B, C and D, free FA contents (B), composition of free FA (C), and FA composition of TAG (D) from 4-week-old tissues of *35S::AtWRII*. Total lipids were extracted and TAGs were separated by TLC. Three independent measurements were averaged, and the error bars represent SD. \* indicates significant difference ( $p < 0.05$ , student's t-test), and \*\* at  $p \leq 0.01$ .

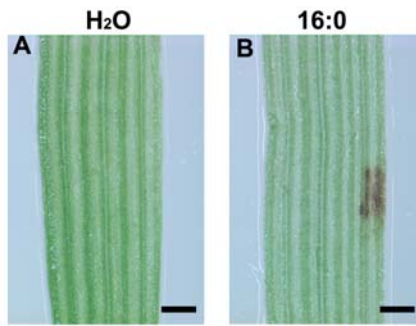

**Figure S7.** Palmitic acid (16:0) treatment of *Brachypodium* leaf blade results in cell death. Phenotypes of wild-type Bd21-3 detached leaf blades treated with 200  $\mu$ m 16:0 for 48 hours. Bars=0.5 mm.



**Supplemental Table S1. PCR primers used in real-time RT-PCR**

| Species      | Gene            | Gene ID             | Primer sequence                                                         |
|--------------|-----------------|---------------------|-------------------------------------------------------------------------|
| Brachypodium | <i>BdWRI1</i>   | <i>Brai4g43877</i>  | F: 5'-CACCTCCCTTACGGTTGATGACA-3'<br>R: 5'-GCATTCTTCAAACAGGCACCCA-3'     |
|              | <i>BdPKP-β1</i> | <i>Bradi2g45620</i> | F: 5'-TACCAAGGCGTTTGGCCAGTT-3'<br>R: 5'-TGAATATTGTGGGTGGATTGCGAC-3'     |
|              | <i>BdKASI</i>   | <i>Bradi1g46610</i> | F: ATCCGAAGAAGCGGGTGG<br>R: GCCCAGCCGCTCTCTC                            |
|              | <i>BdACP1</i>   | <i>Bradi1g01000</i> | F: CCTTCTTCCCGTCGGTTCAGC<br>R: CGTGTCAAGTGAATCAGCCCCA                   |
|              | <i>BdSDP1-1</i> | <i>Bradi2g50610</i> | F: GGGATTGCTGGACCATCTAACA<br>R: CAGTATCACTTCGGCTTTCCT                   |
|              | <i>BdSDP1-2</i> | <i>Bradi1g04310</i> | F: AACAAGGTCCTGGAGCATCAAA<br>R: GGAGTGGAGAGATGTGAGGATTAG                |
|              | <i>BdACX1</i>   | <i>Bradi1g52320</i> | F: TTCCAAGGCTTTGTCCCGT<br>R: CTCACCCACAAATCTAAATGCATAA                  |
|              | <i>BdACX2</i>   | <i>Bradi4g14090</i> | F: CCTACTTGTCCCAGCCTAATCCC<br>R: TGCAAGTGTGAGCAGATGGTTT                 |
|              | <i>BdLACS6</i>  | <i>Bradi4g26610</i> | F: GAGAAATTTGTGTCCGGGGACC<br>R: TCCAGGCAGCCACAAACC                      |
|              | <i>BdLACS7</i>  | <i>Bradi4g42950</i> | F: GGTGGACGGGTGAGGCTTAT<br>R: AGGGTTTGGAGATCCAACATGAC                   |
|              | <i>BdMFP2-1</i> | <i>Bradi2g43020</i> | F: AACACAGTTCGGAATGCCAATG<br>R: CATCGCTCAGGAAAACCTTGGTAAT               |
|              | <i>BdMFP2-2</i> | <i>Bradi4g28310</i> | F: TAAGGGTGAGGAGGCATACCAA<br>R: TCCAAAGCCCAACGACGAG                     |
|              | <i>BdMFP2-3</i> | <i>Bradi4g28310</i> | F: TGGTTTTGGTGTGCTGTGGC<br>R: GTGGCTTCACCTGCCCTTTT                      |
|              | <i>BdKAT1</i>   | <i>Bradi3g27960</i> | F: GGGCTTCAGGCAGTCGCAGAT<br>R: AGGCAATCACGTGCTTGAGAAAATA                |
|              | <i>BdKAT2</i>   | <i>Bradi3g55420</i> | F: GATGGTGCTGGAGCCGTTCT<br>R: CTACCGCAGGACCAACGCC                       |
|              | <i>BdUBC18</i>  | <i>Bradi4g00660</i> | F: GGAGGCACCTCAGGTCATTT<br>R: ATAGCGGTCATTGTCTTGCG                      |
| Arabidopsis  | <i>AtWRI1</i>   | <i>At3g54230</i>    | F: 5'-AAAGGTGTTTTCCCGTTCCTGTGA-3'<br>R: 5'-TAGGCTCTTCCTTCGCTTCTCTCGT-3' |
|              | <i>AtSPD1</i>   | <i>At5g04040</i>    | F: 5'-AAATGGCTTACCGGAGGAAGTT-3'<br>R: 5'-TGAGCCCATTCTCATAAGTCA-3'       |
|              | <i>AtACX1</i>   | <i>At4g16760</i>    | F: 5'-ACGGATGTAAGTCAAAGACTGGC-3'<br>R: 5'-GTGGTGGTGAGAGACTTCAATCCTG-3'  |
|              | <i>AtACX2</i>   | <i>At5g65110</i>    | F: 5'-TGTTACGCCTTCATTGTTCCG-3'<br>R: 5'-TCAACGCACCATTATCCACTCCATT-3'    |

**Supplemental Table S1 continued**

| <b>Species</b> | <b>Gene</b>     | <b>Gene ID</b>   | <b>Primer sequence</b>                                          |
|----------------|-----------------|------------------|-----------------------------------------------------------------|
| Arabidopsis    | <i>AtLACS6</i>  | <i>At3g05970</i> | F: CTA CTGGATGATTTGGCTGCTC<br>R: CTTTCCATTCAAGAGAGCCTGC         |
|                | <i>AtLACS7</i>  | <i>At5g27600</i> | F: GGTTACCTGGTGGTCCGGCTC<br>R: TGAAACACTGCGAAACGAATCTA          |
|                | <i>AtKAT1</i>   | <i>At1g04710</i> | F: CCAGCCGTTGCCATTCCT<br>R: ATAAACAAACTGAGATGCAAATGCC           |
|                | <i>AtKAT2</i>   | <i>At2g33150</i> | F: CGAGATGAAACGCCGTGGTA<br>R: GACCTTGCCTTCAACTTTCCTT            |
|                | <i>AtMFP2</i>   | <i>At3g06860</i> | F: GAGGAAGGTCATTCTTTGGGTCT<br>R: AACGTCAGTATCTCCCTTGCCTCT       |
|                | <i>AtACTIN1</i> | <i>At2g37620</i> | F: 5'-CTCTGTCTGGATTGGAGGGTC-3'<br>R: 5'-GCTTGAGAAATGGTCCGAAA-3' |
